# Supplementary material for: Fitness of Crop-Wild Hybrid Sunflower under Competitive Conditions: Implications for Crop-to-Wild Introgression
Source: PubMed Central journal article supplement (PMC4189920; doi:10.1371/journal.pone.0109001), 2014-10-08
Supplement: pone.0109001.s002.pdf [file pone.0109001.s002.pdf]

**Supplementary Table S1. Sample sizes for number of focal seeds that emerged (before slash) or that survived to reproduce (after the slash).** Yellow cells are calculated from a possible total of 47-48 focal seeds planted rather than 106-108 for clear cells. Overall sample size for focal seeds was 4824. Cross type: W (wild x wild), F1 hybrid (wild x crop), F2 hybrid (F1 x F1), and BCw hybrid (wild x F1) generations (with the maternal parent indicated first).

|                                        |              |                           |         | Density of Intraspecific Competitors |       |       |       |                                     |       |       |       |                                   |       |       |       |
|----------------------------------------|--------------|---------------------------|---------|--------------------------------------|-------|-------|-------|-------------------------------------|-------|-------|-------|-----------------------------------|-------|-------|-------|
|                                        |              |                           |         | Low (100 sd per m <sup>2</sup> )     |       |       |       | Medium (255 sd per m <sup>2</sup> ) |       |       |       | High (495 sd per m <sup>2</sup> ) |       |       |       |
|                                        |              |                           |         | Cross type                           |       |       |       | Cross type                          |       |       |       | Cross type                        |       |       |       |
|                                        |              |                           |         | W                                    | BCw   | F1    | F2    | W                                   | BCw   | F1    | F2    | W                                 | BCw   | F1    | F2    |
| Frequency of Intraspecific Competitors | Lower (15%)  | Interspecific Competition | Without | 72/68                                | 26/26 | 26/23 | 15/13 | 68/58                               | 68/58 | 58/53 | 45/36 | 75/55                             | 68/52 | 55/40 | 48/37 |
|                                        |              |                           | With    | 71/63                                | 29/27 | 24/21 | 18/15 | 76/68                               | 61/54 | 48/43 | 44/35 | 75/53                             | 71/53 | 53/41 | 42/28 |
|                                        | Higher (40%) | Interspecific Competition | Without | 74/69                                | 71/67 | 61/57 | 42/36 | 72/66                               | 68/63 | 53/46 | 43/36 | 76/55                             | 59/40 | 54/40 | 42/33 |
|                                        |              |                           | With    | 76/71                                | 68/62 | 49/45 | 47/44 | 71/64                               | 73/59 | 60/52 | 48/42 | 73/56                             | 62/39 | 44/32 | 49/39 |
