# Supplementary material for: Fitness of Crop-Wild Hybrid Sunflower under Competitive Conditions: Implications for Crop-to-Wild Introgression
Source: PubMed Central journal article supplement (PMC4189920; doi:10.1371/journal.pone.0109001), 2014-10-08
Supplement: pone.0109001.s003.pdf [file pone.0109001.s003.pdf]

**Supplemental Table S2. ANOVA on number of viable seeds per head on crop-wild hybrid sunflowers grown in the field in Kansas, USA.**

| Source                    | Ndf | Primary HQ |       |                  | Primary LQ |       |                  | Secondary HQ |       |                  | Secondary LQ |      |                  |
|---------------------------|-----|------------|-------|------------------|------------|-------|------------------|--------------|-------|------------------|--------------|------|------------------|
|                           |     | ddf        | F     | P                | ddf        | F     | P                | ddf          | F     | P                | ddf          | F    | P                |
| Frequency of Hybrids      | 1   | 155        | 1.69  | 0.1985           | 55         | 0.89  | 0.3492           | 55           | 0.13  | 0.7159           | 55           | 0.29 | 0.5948           |
| Interspec Competitors     | 1   | 55         | 10.19 | <b>0.0023</b>    | 55         | 0.07  | 0.7888           | 55           | 3.91  | 0.0529           | 55           | 0.21 | 0.6465           |
| Density of Seeding        | 2   | 55         | 25.46 | <b>&lt;.0001</b> | 55         | 1.7   | 0.1913           | 55           | 8.74  | <b>0.0005</b>    | 55           | 0.37 | 0.6922           |
| Freq*Interspec            | 1   | 55         | 0.4   | 0.5291           | 55         | 0.47  | 0.4959           | 55           | 0     | 0.9587           | 55           | 0.23 | 0.631            |
| Freq*Dens                 | 2   | 55         | 0.13  | 0.8803           | 55         | 1.86  | 0.166            | 55           | 4.23  | <b>0.0196</b>    | 55           | 0.25 | 0.7781           |
| Interspec*Dens            | 2   | 55         | 0.31  | 0.7342           | 55         | 0.24  | 0.7856           | 55           | 0.25  | 0.7819           | 55           | 0.59 | 0.5574           |
| Freq*Interspec*Dens       | 2   | 55         | 1.23  | 0.3006           | 55         | 0.44  | 0.6436           | 55           | 0.11  | 0.8949           | 55           | 0.82 | 0.4458           |
| Cross Type                | 3   | 175        | 13.02 | <b>&lt;.0001</b> | 108        | 14.63 | <b>&lt;.0001</b> | 114          | 33.25 | <b>&lt;.0001</b> | 84           | 8.59 | <b>&lt;.0001</b> |
| Freq*Cross                | 3   | 175        | 0.59  | 0.6216           | 108        | 0.4   | 0.7558           | 114          | 0.2   | 0.8941           | 84           | 0.11 | 0.9551           |
| Interspec*Cross           | 3   | 175        | 0.24  | 0.8693           | 108        | 0.97  | 0.4078           | 114          | 0.53  | 0.6614           | 84           | 0.18 | 0.9081           |
| Dens*Cross                | 6   | 175        | 1.17  | 0.3267           | 108        | 1.08  | 0.3765           | 114          | 0.59  | 0.7343           | 84           | 1.79 | 0.1112           |
| Freq*Interspec*Cross      | 3   | 175        | 1.15  | 0.3309           | 108        | 4.88  | <b>0.0032</b>    | 114          | 0.02  | 0.9963           | 84           | 0.22 | 0.8805           |
| Freq*Dens*Cross           | 6   | 175        | 0.72  | 0.6318           | 108        | 0.34  | 0.9116           | 114          | 0.99  | 0.4377           | 84           | 1.42 | 0.2184           |
| Interspec*Dens*Cross      | 6   | 175        | 0.47  | 0.8312           | 108        | 0.34  | 0.9129           | 114          | 0.86  | 0.5239           | 84           | 0.83 | 0.5471           |
| Freq*Interspec*Dens*Cross | 6   | 175        | 0.97  | 0.4439           | 108        | 0.92  | 0.4844           | 114          | 1.26  | 0.28             | 84           | 0.66 | 0.6784           |

Notes: Primary and secondary high (HQ) and low (LQ) quality head data analyzed separately. Only data from plants who survived to reproduce were employed in the ANOVA using Restricted Maximum Likelihood. Data include only primary and first secondary heads and were natural log transformed. P-values <0.05 are bolded as significant. nnf, numerator degrees of freedom; ddf, denominator degrees of freedom.
